# Supplementary material for: SVM-RFE: selection and visualization of the most relevant features through non-linear kernels
Source: PubMed Central journal article supplement (PMC6245920; doi:10.1186/s12859-018-2451-4), 2018-11-19

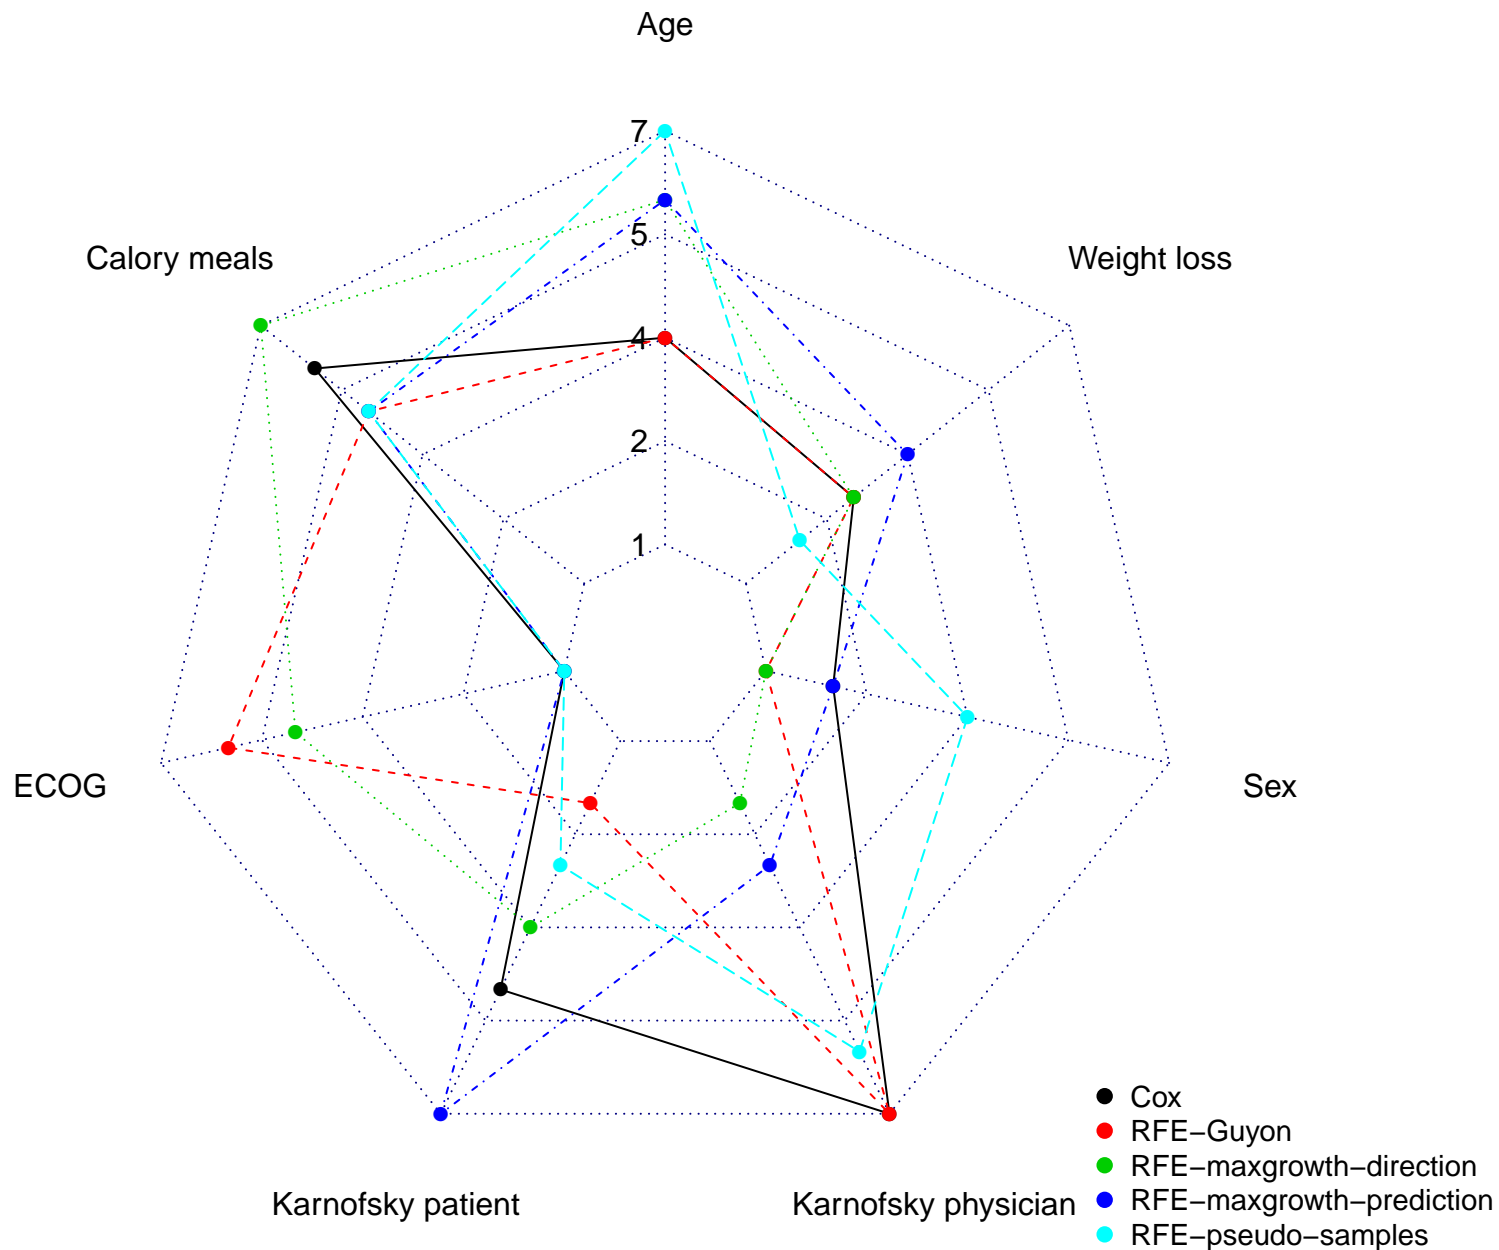

Supplement: 12859_2018_2451_MOESM12_ESM.pdf [file 12859_2018_2451_MOESM12_ESM.pdf]
